# Supplementary material
Source: MDPI journal article supplement (https://www.mdpi.com/search?q=biomolecules-09-00355)
Supplement: s001 [file biomolecules-09-00355-s001.pdf]

**Table S1.** SNPs information and genotyping results for RA patients and control group.

| SNP ID           | Allele   | SNP Type/<br>Amino Acid<br>Change | MAF  |         |                |
|------------------|----------|-----------------------------------|------|---------|----------------|
|                  |          |                                   | RA   | Control | HapMap-<br>CEU |
| <b>rs1870377</b> | +1416A/T | exon 11<br>H472Q                  | 0.32 | 0.27    | 0.21           |
| <b>rs2305948</b> | +889 G/A | exon 7<br>V297I                   | 0.18 | 0.14    | 0.15           |
| <b>rs2071559</b> | -604 C/T | promoter<br>region                | 0.48 | 0.60    | 0.50           |

MAF - minor allele frequency; CEU - Utah residents of northern and western European ancestry; UTR – untranslated region

**Table S2.** Association between genotypes of KDR+1416A/T and clinical characteristics among RA patients.

| Parameter                         | AA  |                    | AT+TT |                    | p*          |
|-----------------------------------|-----|--------------------|-------|--------------------|-------------|
|                                   | N   | median (IQR)       | N     | median (IQR)       |             |
| Age [years]                       | 447 | 50 (32 - 60)       | 448   | 51.5 (34.5 – 60)   | 0.612       |
| Disease duration [years]          | 239 | 10 (5 - 16)        | 267   | 9 (4 – 15)         | 0.116       |
| Larsen                            | 255 | 3 (3 -4 )          | 282   | 3 (2 - 3)          | 0.334       |
| Number of tender joints           | 152 | 7 (2 – 11)         | 163   | 8 (4 -13)          | 0.130       |
| Number of swollen joints          | 152 | 3 (1 – 7)          | 165   | 3 (1 – 8)          | 0.217       |
| ESR [mm/h]                        | 251 | 30 (17 – 51)       | 284   | 30 (16 – 50)       | 0.586       |
| CRP [mg/L]                        | 153 | 14 (6 – 32)        | 169   | 11.7 (5.3 – 32)    | 0.329       |
| Hemoglobin [g/dL]                 | 154 | 12.6 (11.7 – 13.4) | 168   | 12.8 (11.7 – 13.7) | 0.604       |
| VAS [mm]                          | 147 | 51 (30 – 71)       | 161   | 53 (34 – 70)       | 0.575       |
| DAS 28-CRP                        | 147 | 5 (3.8 – 5.7)      | 164   | 5 (3.8 – 5.9)      | 0.454       |
| HAQ                               | 129 | 1.62 (1 – 2)       | 136   | 1.5 (1 – 2)        | 0.398       |
| PLT [ $\times 10^3/\text{mm}^3$ ] | 153 | 305 (290 – 350)    | 168   | 308 (251 – 369)    | 0.911       |
| Creatinine                        | 153 | 0.7 (06 – 0.8)     | 166   | 0.7 (06 – 0.8)     | 0.481       |
|                                   |     |                    |       |                    | p**         |
|                                   | N   | n (%)              | N     | n (%)              |             |
| Women                             | 450 | 349 (82%)          | 448   | 369 (78%)          | <b>0.07</b> |
| RF presence                       | 251 | 158 (63%)          | 283   | 203 (72%)          | <b>0.03</b> |
| anti-CCP presence                 | 154 | 116 (75%)          | 171   | 141 (82%)          | 0.114       |

**Table S3.** Association between genotypes of KDR -604 C/T and clinical characteristics among RA patients.

| Parameter                         | TT  |                    | TC+CC |                    | p*           |
|-----------------------------------|-----|--------------------|-------|--------------------|--------------|
|                                   | N   | median (IQR)       | N     | median (IQR)       |              |
| Age [years]                       | 175 | 55 (48 – 63)       | 777   | 48 (30 – 59)       | 0.679        |
| Disease duration [years]          | 135 | 10 (5 - 16)        | 388   | 10 (4.5 – 15.5)    | 0.748        |
| Larsen                            | 145 | 3 (3 – 4)          | 420   | 3 (2 – 4)          | 0.241        |
| Number of tender joints           | 81  | 8 (3 – 13)         | 256   | 7 (3 – 11)         | 0.466        |
| Number of swollen joints          | 83  | 4 (1 - 7)          | 256   | 3 (1 – 7)          | 0.483        |
| ESR [mm/h]                        | 144 | 31 (18 - 50)       | 419   | 30 (16 – 50)       | 0.728        |
| CRP [mg/L]                        | 83  | 18 (7 - 40)        | 260   | 12 (6 – 30)        | 0.066        |
| Hemoglobin [g/dL]                 | 84  | 12.3 (11.4 – 13.2) | 259   | 12.8 (11.8 – 13.6) | 0.122        |
| VAS [mm]                          | 79  | 55 (40 – 72)       | 251   | 52 (32 – 71)       | 0.525        |
| DAS 28-CRP                        | 80  | 5.6 (4.1 – 6.2)    | 253   | 5 (3.9 – 6.7)      | 0.138        |
| HAQ                               | 71  | 1.5 (1 – 2)        | 215   | 1.5 (1 – 2)        | 0.670        |
| PLT [ $\times 10^3/\text{mm}^3$ ] | 84  | 310 (260 – 375)    | 258   | 305 (245 – 381)    | 0.605        |
| Creatinine                        | 82  | 0.7 (0.6 – 0.8)    | 258   | 0.7 (0.6 – 0.8)    | 0.977        |
|                                   |     |                    |       |                    | p**          |
|                                   | N   | n (%)              | N     | n (%)              |              |
| Women                             | 176 | 149 (85%)          | 779   | 607 (88%)          | <b>0.046</b> |
| RF presence                       | 144 | 99 (69%)           | 415   | 286 (69%)          | 0.970        |
| anti-CCP presence                 | 84  | 65 (77%)           | 262   | 213 (81%)          | 0.431        |
